# Supplementary material
Source: MDPI journal article supplement (https://www.mdpi.com/2073-4344/13/2/308)
Supplement: s1 [file s1]

## Supporting Documents

# Unveiling the Photocatalytic Activity of Carbon Dots/g-C<sub>3</sub>N<sub>4</sub> Nanocomposite for the O-Arylation of 2-Chloroquinoline-3-carbaldehydes

**Ravichandran Manjupriya and Selvaraj Mohana Roopan \***

Chemistry of Heterocycles & Natural Product Research Laboratory, Department of Chemistry,  
School of Advanced Sciences, Vellore Institute of Technology, Vellore 632 014, India

\* Correspondence: mohanaroopan.s@vit.ac.in; Tel.: +0416-220-2313

---

### Text S1. Materials details

All of the analytical-grade chemicals were procured from Sigma-Aldrich, India, and Alpha-Aldrich and used as such. Avra Synthesis Pvt. Ltd. in India supplied the ethanol and other solvents. All reagents used were of analytical grade (AR) and used without further purification, and deionized water was made in our lab.

### Text S2. Characterization details

All samples' X-ray diffraction patterns were obtained using the Bruker D8 Advance X-ray diffraction technique with CuK $\alpha$  radiation ( $\lambda = 0.154$  nm) in the range of  $2\theta$  from  $10^\circ$  to  $90^\circ$  at a scan speed of  $2^\circ \text{ min}^{-1}$ . The surface chemical composition was confirmed using X-ray photoelectron spectra (XPS) (TPHI 5000 Versa Probe III) with an Al K X-ray source. With the aid of KBr pellets, the FT-IR spectra were determined on a Shimadzu spectrophotometer. For each sample, 48 scans were logged with a resolution of  $2 \text{ cm}^{-1}$  in the  $4000\text{--}400 \text{ cm}^{-1}$  range. The compositional and morphological examination of the synthesized samples was investigated using transmission electron microscopy (Tecnai G2-20 twin field emission microscope). Quantachrome analyzer was used to assess the materials' specific surface areas, and a zeta potential (HORIBA SZ-100) was used to measure the surface charge and stability of the built-up materials. In the Zeta potential analysis condition, the electrode was filled with synthesized materials dispersed in distilled water, and the parameters were adjusted to 3.4 V electrode voltage,  $25^\circ\text{C}$  temperature, a 10 min data capture period, and a pH of 7. HR-MS was conducted by Ultimate 3000 UHPLC-Q Exactive (Thermo Scientific, US) to determine the mass of the compound. The Jasco V-670 spectrometer and Shimadzu (RF-700) spectrometer systems were used to record UV Vis-DRS and photoluminescence spectra.

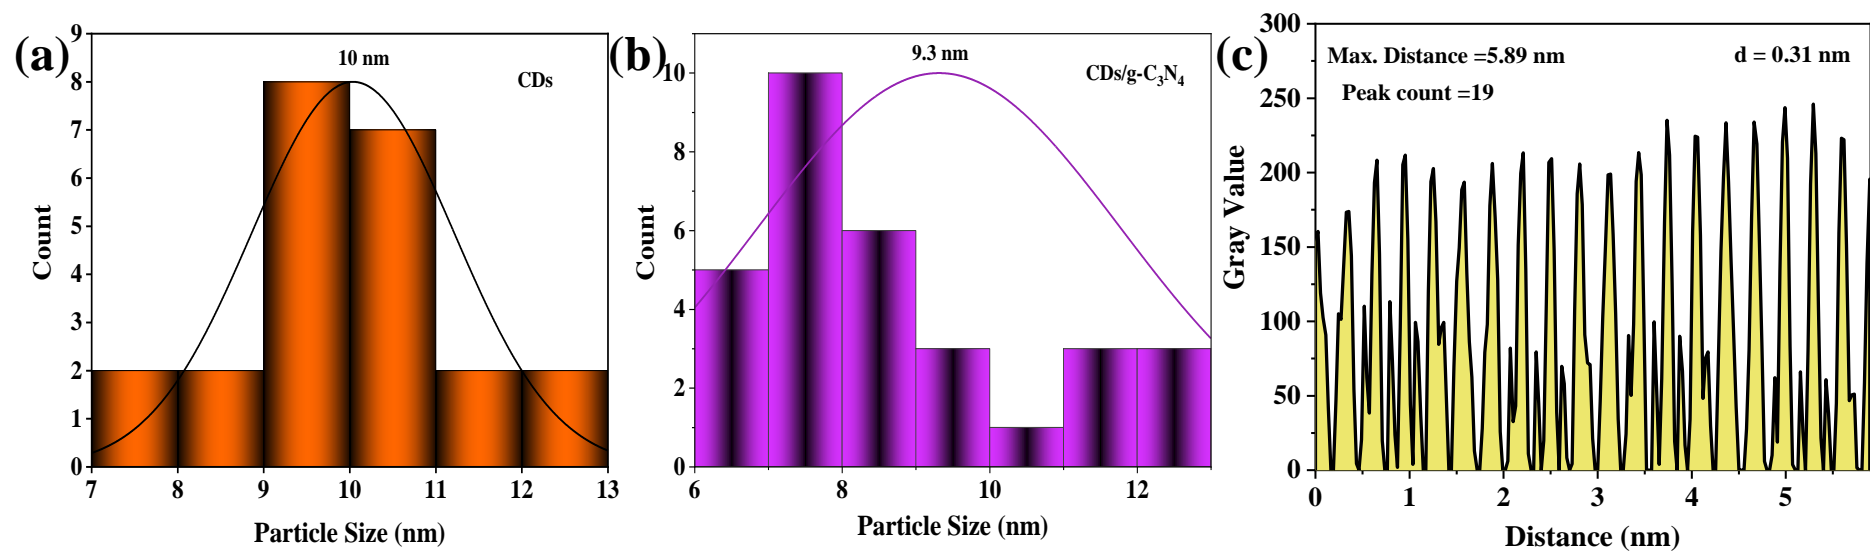

**Figure S1.** Particle size histogram of a) CDs, b) 3CDCN, and c) HRTEM d-spacing value of 3CDCN calculation

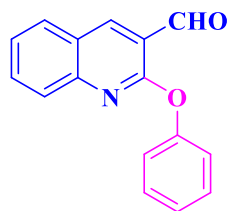

**C<sub>16</sub>H<sub>11</sub>NO<sub>2</sub>**  
**Exact Mass: 249.08**  
**3.1**

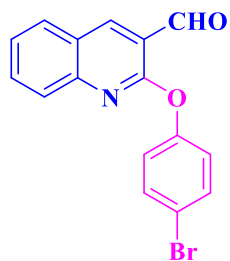

**C<sub>16</sub>H<sub>10</sub>BrNO<sub>2</sub>**  
**Exact Mass: 326.99**  
**3.2**

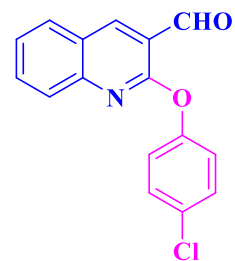

**C<sub>16</sub>H<sub>10</sub>ClNO<sub>2</sub>**  
**Exact Mass: 283.04**  
**3.3**

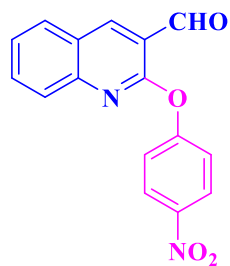

**C<sub>16</sub>H<sub>10</sub>N<sub>2</sub>O<sub>4</sub>**  
**Exact Mass: 294.06**  
**3.4**

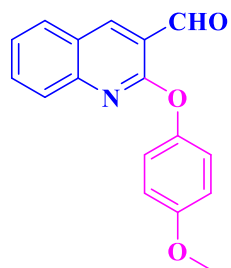

**C<sub>17</sub>H<sub>13</sub>NO<sub>3</sub>**  
**Exact Mass: 279.09**  
**3.5**

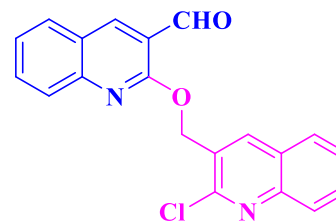

**C<sub>20</sub>H<sub>13</sub>ClN<sub>2</sub>O<sub>2</sub>**  
**Exact Mass: 348.07**  
**3.6**

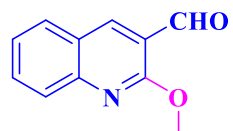

**C<sub>11</sub>H<sub>9</sub>NO<sub>2</sub>**  
**Exact Mass: 187.06**  
**3.7**

Characterization data of organic compounds:

| S.No. | Structure of the compound                                                          | Name of the compound<br>& Molecular formula                                                               | Appearance<br>& Melting<br>point (°C) | FT-IR,<br>v/cm <sup>-1</sup>                 | <sup>1</sup> H-NMR (400 MHz,<br>CDCl <sub>3</sub> , Me <sub>4</sub> Si) (ppm):                                                | <sup>13</sup> C-NMR (100 MHz, CDCl <sub>3</sub> ,<br>Me <sub>4</sub> Si) (ppm):                                           | HRMS<br>[M+H] <sup>+</sup> |
|-------|------------------------------------------------------------------------------------|-----------------------------------------------------------------------------------------------------------|---------------------------------------|----------------------------------------------|-------------------------------------------------------------------------------------------------------------------------------|---------------------------------------------------------------------------------------------------------------------------|----------------------------|
| 3.1.  | 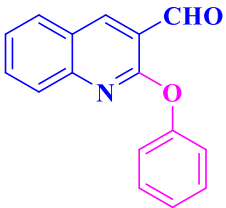  | 2-phenoxyquinoline-3-<br>carbaldehyde & C <sub>16</sub> H <sub>11</sub> NO <sub>2</sub>                   | Colourless<br>crystals &<br>126 °C    | 2959,<br>1688,<br>1257,<br>893,<br>754, 682  | δ 10.60 (s, 1H), 8.68 (s,<br>1H), 7.84 (t, 1H), 7.69 (t,<br>1H), 7.65 (d, 1H), 7.43<br>(m, 3H), 7.26 (d, 2H),<br>7.22 (d, 1H) | δ 187.96, 159.49, 152.06,<br>147.61, 139.53, 131.69, 128.61,<br>128.51, 126.85, 124.77, 124.19,<br>124.15, 120.78, 119.21 | 250.0872                   |
| 3.2.  |  | 2-(4-<br>bromophenoxy)quinoline-3-<br>carbaldehyde &<br>C <sub>16</sub> H <sub>10</sub> BrNO <sub>2</sub> | White solid<br>& 148 °C               | 2959,<br>1689,<br>1206,<br>1011,<br>900, 806 | δ 10.56 (s, 1H), 8.68 (s,<br>1H), 7.85 (d, 1H), 7.69 (d,<br>1H), 7.66 (t, 1H), 7.52 (d,<br>2H), 7.44 (m, 1H), 7.15<br>(d, 2H) | δ 188.60, 160.01, 152.02,<br>148.39, 140.81, 132.89, 132.51,<br>129.65, 127.75, 125.99, 125.22,<br>123.72, 120.02, 118.10 | 327.9975                   |

|      |                                                                                    |                                                                    |                      |                                   |                                                                                                                                        |                                                                                                                         |          |
|------|------------------------------------------------------------------------------------|--------------------------------------------------------------------|----------------------|-----------------------------------|----------------------------------------------------------------------------------------------------------------------------------------|-------------------------------------------------------------------------------------------------------------------------|----------|
| 3.3. | 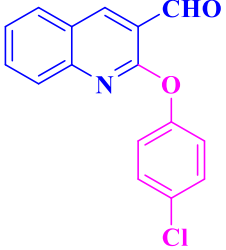  | 2-(4-chlorophenoxy)quinoline-3-carbaldehyde & $C_{16}H_{10}ClNO_2$ | White solid & 165 °C | 3054, 2862, 1685, 1212, 1079, 691 | $\delta$ 10.57 (s, 1H), 8.68 (s, 1H), 7.85 (d, 1H), 7.69 (d, 2H), 7.44 (t, 1H), 7.39 (d, 2H), 7.22 (d, 1H), 7.20 (d, 1H)               | $\delta$ 187.67, 159.13, 150.44, 147.42, 139.79, 131.87, 129.48, 128.65, 128.55, 126.76, 124.96, 124.21, 122.27, 119.03 | 284.0478 |
| 3.4. |   | 2-(4-nitrophenoxy)quinoline-3-carbaldehyde & $C_{16}H_{10}N_2O_4$  | White solid & 134 °C | 3126, 2854, 1695, 1509, 846, 752  | $\delta$ 10.56 (s, 1H), 8.74 (s, 1H), 8.31 (d, 2H), 7.90 (d, 1H), 7.71 (d, 1H), 7.70 (d, 1H), 7.50 (m, 1H), 7.45 (d, 2H)               | $\delta$ 188.70, 140.81, 132.90, 130.50, 129.67, 129.57, 127.78, 125.98, 123.29                                         | 295.0727 |
| 3.5. |  | 2-(4-methoxyphenoxy)quinoline-3-carbaldehyde & $C_{17}H_{13}NO_3$  | White solid & 120 °C | 2953, 1692, 1500, 1200, 758, 556  | $\delta$ 10.59 (s, 1H), 8.66 (s, 1H), 7.83 (d, 1H), 7.60 (d, 1H), 7.64 (d, 1H), 7.40 (t, 1H), 7.18 (d, 2H), 6.93 (d, 2H), 3.80 (s, 3H) | $\delta$ 189.11, 160.85, 140.48, 132.66, 129.63, 127.84, 125.66, 125.08, 122.74, 120.15, 114.56, 55.66                  | 280.0978 |

|      |                                                                                   |                                                                                                                                 |                         |                                                       |                                                                                                                                                                          |                                                                                                                                                                |          |
|------|-----------------------------------------------------------------------------------|---------------------------------------------------------------------------------------------------------------------------------|-------------------------|-------------------------------------------------------|--------------------------------------------------------------------------------------------------------------------------------------------------------------------------|----------------------------------------------------------------------------------------------------------------------------------------------------------------|----------|
| 3.6. | 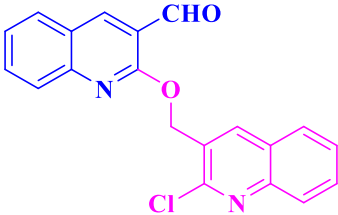 | 2-((2-chloroquinolin-3-yl)methoxy)quinoline-3-carbaldehyde &<br>C <sub>20</sub> H <sub>13</sub> ClN <sub>2</sub> O <sub>2</sub> | White solid<br>& 180 °C | 1600,<br>1328,<br>1018,<br>753, 492                   | δ 10.53 (s, 1H), 8.60 (s, 1H), 8.00 (d, 1H), 8.35 (s, 1H) 7.86 (d, 1H), 7.81 (d, 1H), 7.80 (d, 1H), 7.73 (d, 1H), 7.67 (d, 1H), 7.53 (t, 1H), 7.43 (t, 1H), 5.85 (s, 2H) | δ 187.77, 158.90, 147.67, 146.22, 139.79, 136.81, 131.85, 129.62, 128.74, 127.71, 127.33, 126.64, 126.43, 126.32, 126.10, 124.49, 123.68, 118.94, 63.81, 28.68 | 349.0744 |
| 3.7. |  | 2-methoxyquinoline-3-carbaldehyde & C <sub>11</sub> H <sub>9</sub> NO <sub>2</sub>                                              | White solid<br>& 109 °C | 3350,<br>2870,<br>1594,<br>1337,<br>1003,<br>759, 471 | δ 10.40 (s, 1H), 8.52 (s, 1H), 7.82 (t, 2H), 7.69 (td, 1H), 7.38 (t, 1H), 4.12 (s, 3H)                                                                                   | δ 189.35, 161.26, 148.96, 140.06, 132.59, 129.75, 127.28, 125.06, 124.41, 120.09, 53.88                                                                        | 187.0712 |

Signature SIF VIT VELLORE  
Phenol

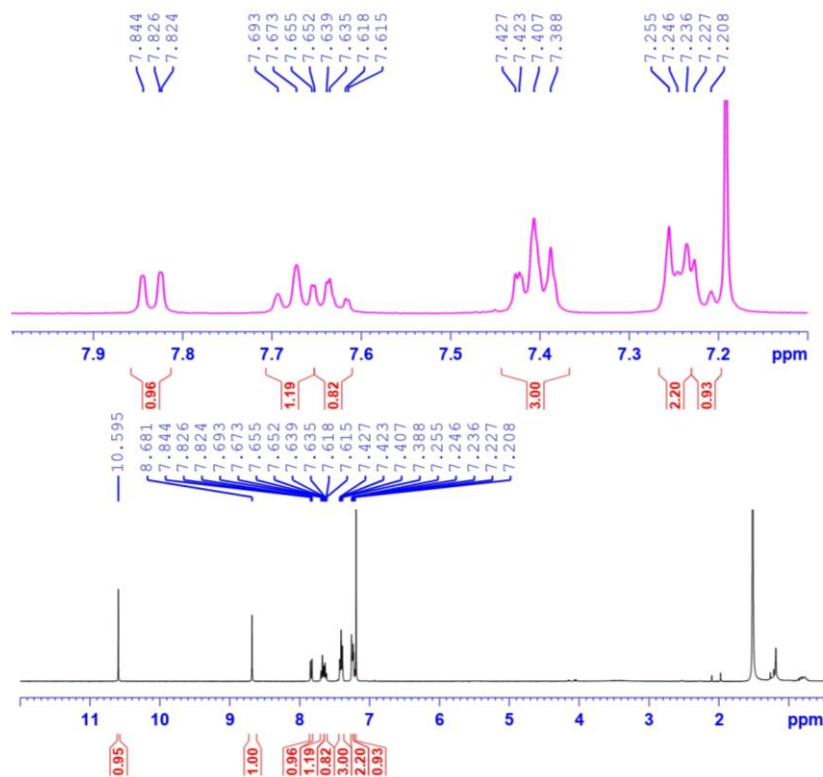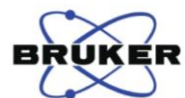

Current Data Parameters  
NAME Dr.MOO071222  
EXPNO 13  
PROCNO 1

F2 - Acquisition Parameters  
Date\_ 20221207  
Time 16.53 h  
INSTRUM spect  
PROBHD Z108618\_0505 (   
PULPROG zg30  
TD 65536  
SOLVENT CDCl3  
NS 32  
DS 2  
SWH 8012.820 Hz  
FIDRES 0.244532 Hz  
AQ 4.0894465 sec  
RG 199.6  
DW 62.400 usec  
DE 6.50 usec  
TE 305.1 K  
D1 1.00000000 sec  
TDO 1  
SFO1 400.2604716 MHz  
NUC1 1H  
F1 15.00 usec  
PLW1 14.95499992 W

F2 - Processing parameters  
SI 65536  
SF 400.2580370 MHz  
WDW EM  
SSB 0  
LB 0.30 Hz  
GB 0  
PC 1.00

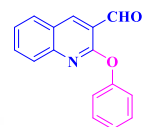

$C_{16}H_{11}NO_2$   
Exact Mass: 249.08

**Figure S2.**  $^1H$  NMR spectrum of 2-phenoxyquinoline-3-carbaldehyde (3.1)

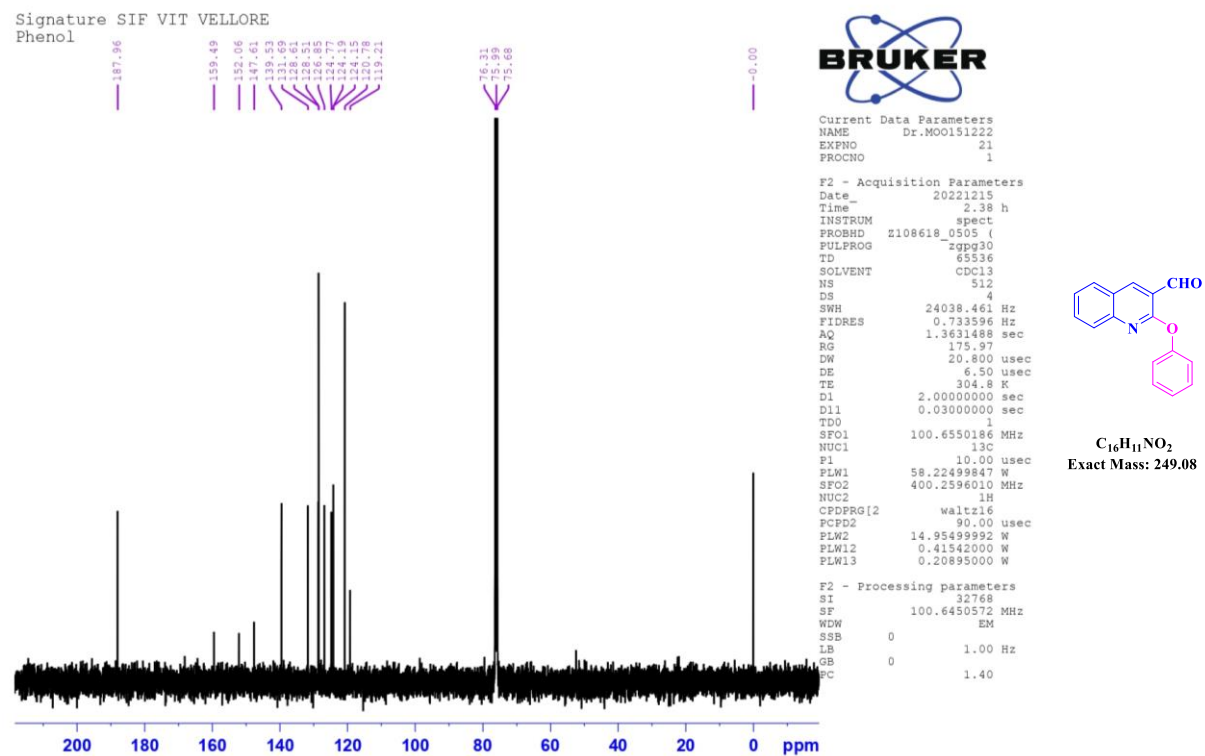



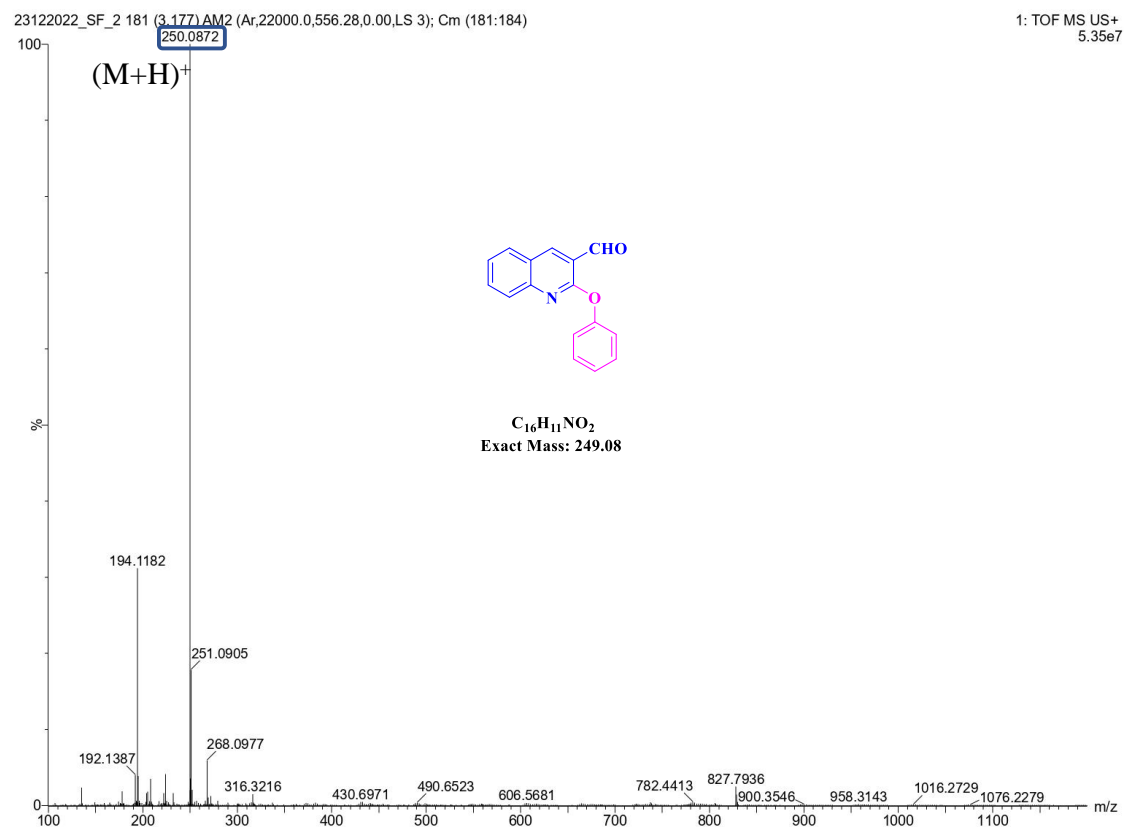

**Figure S4.** HRMS spectrum of 2-phenoxyquinoline-3-carbaldehyde (**3.1**)

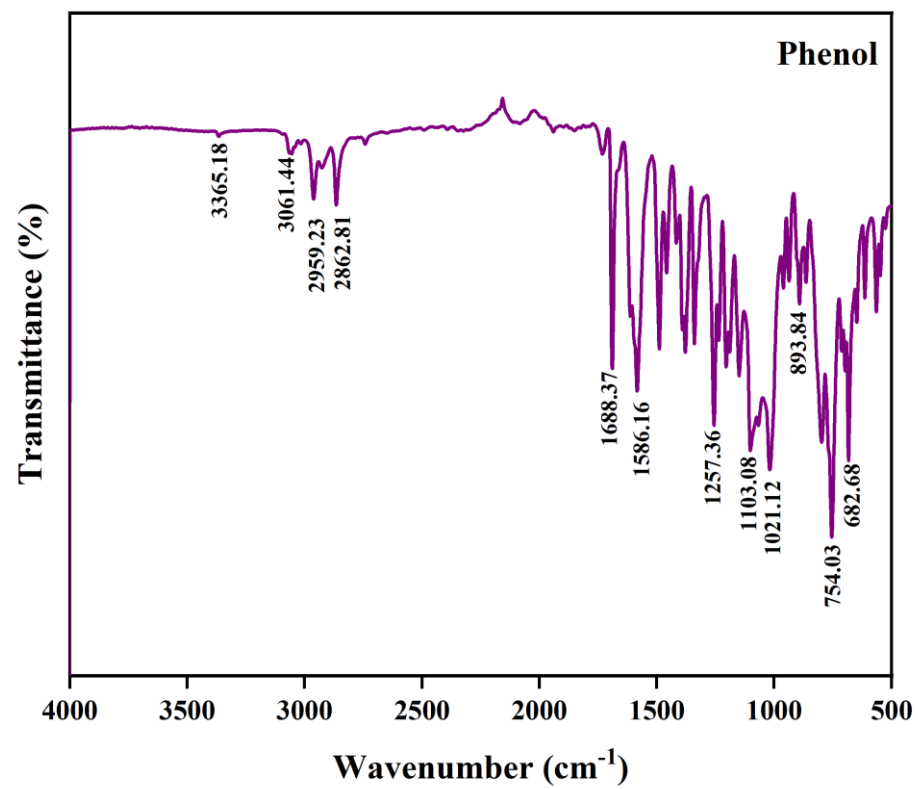

Figure S5. FTIR spectrum of 2-phenoxyquinoline-3-carbaldehyde (3.1)

Signature SIF VIT VELLORE  
Bromo

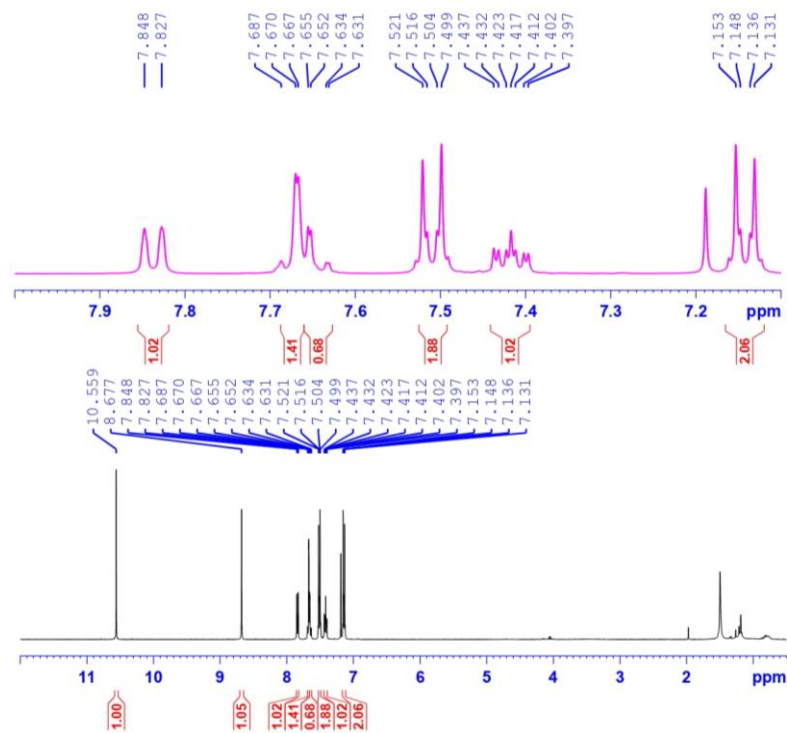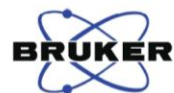

Current Data Parameters  
NAME Dr.MOO021222  
EXPNO 5  
PROCNO 1

F2 - Acquisition Parameters  
Date\_ 20221202  
Time 13.35 h  
INSTRUM spect  
PROBHD Z108618\_0505 (   
PULPROG zg30  
TD 65536  
SOLVENT CDCl3  
NS 32  
DS 2  
SWH 8012.820 Hz  
FIDRES 0.244532 Hz  
AQ 4.0894465 sec  
RG 199.6  
DW 62.400 usec  
DE 6.50 usec  
TE 305.1 K  
D1 1.00000000 sec  
TDO 1  
SFO1 400.2604716 MHz  
NUC1 1H  
P1 15.00 usec  
PL1 14.95499992 W  
F2 - Processing parameters  
SI 65536  
SF 400.2580382 MHz  
WDW EM  
SSB 0  
LB 0.30 Hz  
GB 0  
PC 1.00

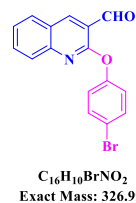

Figure S6. <sup>1</sup>H NMR spectrum of 2-(4-bromophenoxy)quinoline-3-carbaldehyde (3.2)

Signature SIF VIT VELLORE  
Bromo

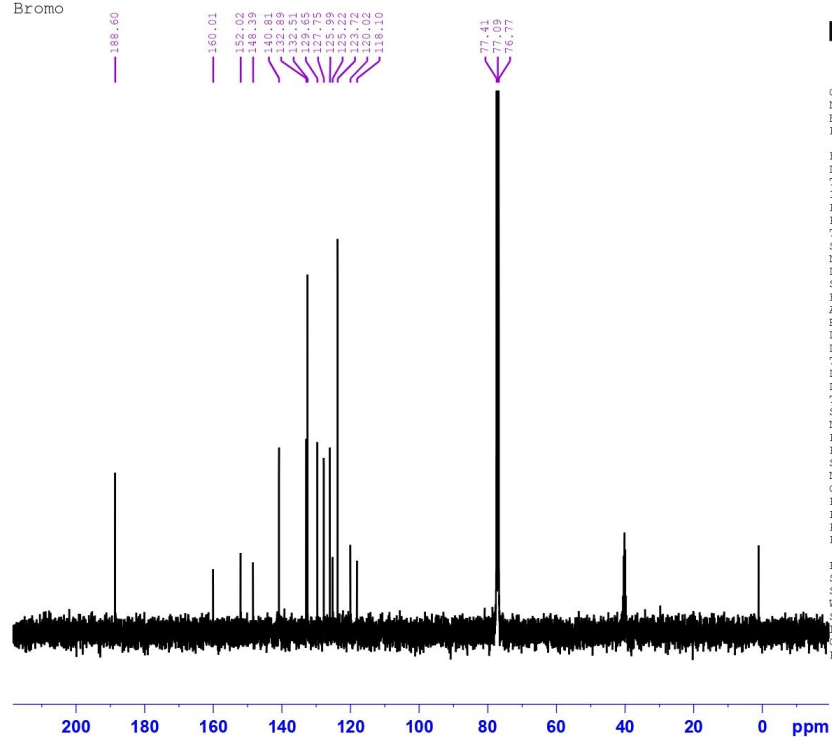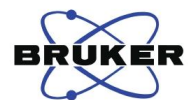

Current Data Parameters  
NAME Dr.M00051222  
EXPNO 7  
PROCNO 1

F2 - Acquisition Parameters  
Date\_ 20221206  
Time 11.43 h  
INSTRUM spect  
PROBHD Z108618\_0505 (  
PULPROG zgpg30  
TD 65536  
SOLVENT CDCl3  
NS 512  
DS 4  
SWH 24038.461 Hz  
FIDRES 0.733596 Hz  
AQ 1.3631488 sec  
RG 199.6  
DW 20.800 usec  
DE 6.50 usec  
TE 306.3 K  
D1 2.00000000 sec  
D11 0.03000000 sec  
TD0 1  
SFO1 100.6550186 MHz  
NUC1 13C  
P1 10.00 usec  
PLW1 58.22499847 W  
SFO2 400.2596010 MHz  
NUC2 1H  
CPDPRG2 waltz16  
PCPD2 90.00 usec  
PLW2 14.95499992 W  
PLW12 0.41542000 W  
PLW13 0.20895000 W

F2 - Processing parameters  
SI 32768  
SF 100.6449542 MHz  
WDW EM  
SSB 0  
LB 1.00 Hz  
GB 0  
PC 1.40

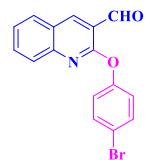

$C_{16}H_{10}BrNO_2$   
Exact Mass: 326.99

Figure S7.  $^{13}C$  NMR spectrum of 2-(4-bromophenoxy)quinoline-3-carbaldehyde (3.2)

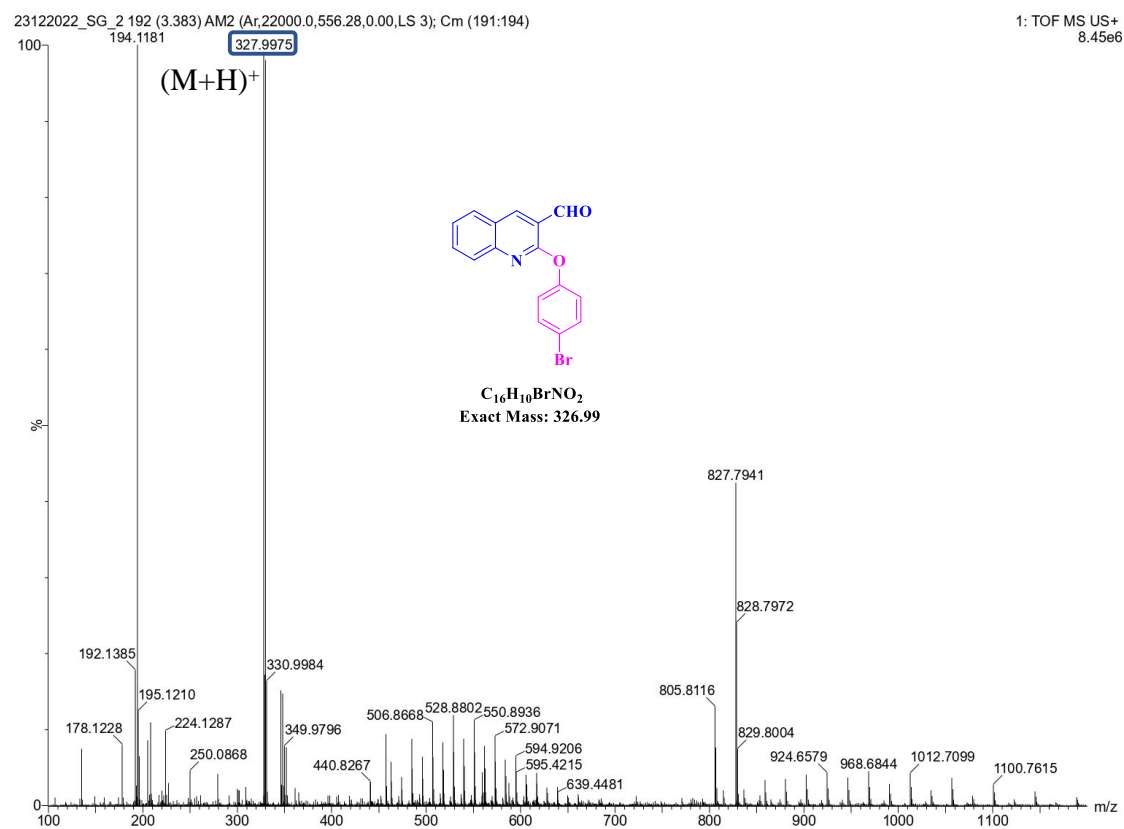

Figure S8. HRMS spectrum of 2-(4-bromophenoxy)quinoline-3-carbaldehyde (3.2)

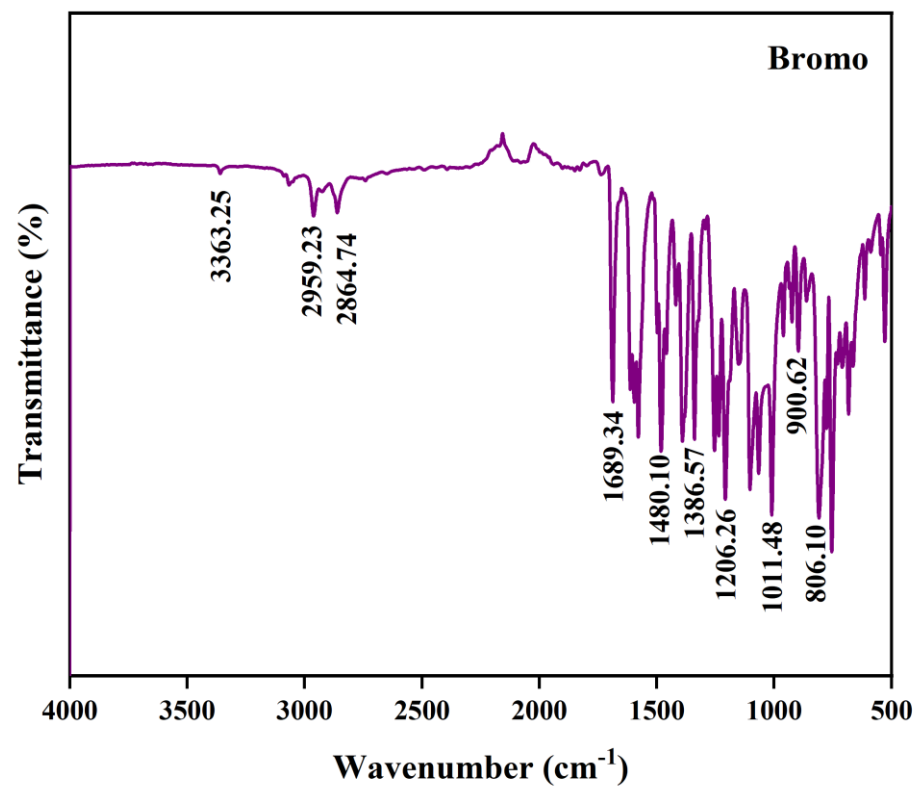

**Figure S9.** FTIR spectrum of 2-(4-bromophenoxy)quinoline-3-carbaldehyde (3.2)

Signature SIF VIT VELLORE  
Chloro

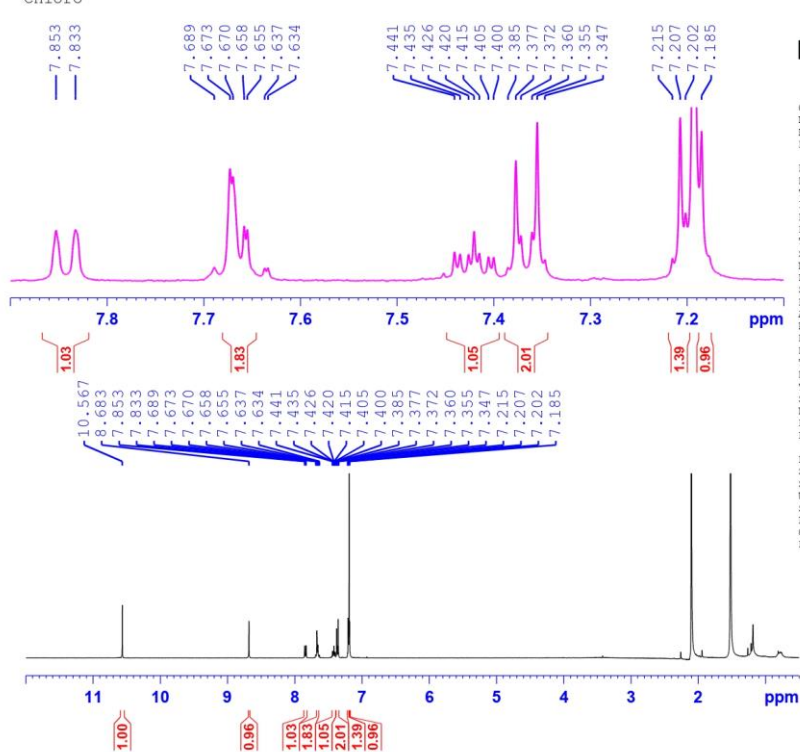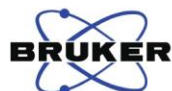

Current Data Parameters  
NAME Dr.MMG131222  
EXPNO 3  
PROCNO 1

F2 - Acquisition Parameters  
Date 20221213  
Time 10.39 h  
INSTRUM spect  
PROBHD Z108618\_0505 (   
PULPROG zg30  
TD 65536  
SOLVENT CDC13  
NS 32  
DS 2  
SWH 8012.820 Hz  
FIDRES 0.244532 Hz  
AQ 4.0894465 sec  
RG 199.6  
DW 62.400 usec  
DE 6.50 usec  
TE 303.0 K  
D1 1.00000000 sec  
TD0 1  
SFO1 400.2604716 MHz  
NUC1 1H  
P1 15.00 usec  
PLWL 14.95499992 W

F2 - Processing parameters  
SI 65536  
SF 400.2580364 MHz  
WDW EM  
SSB 0  
LB 0.30 Hz  
GB 0  
FC 1.00

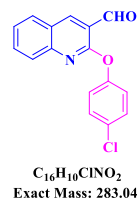

Figure S10. <sup>1</sup>H NMR spectrum of 2-(4-chlorophenoxy)quinoline-3-carbaldehyde (3.3)

Signature SIF VIT VELLORE  
Chloro

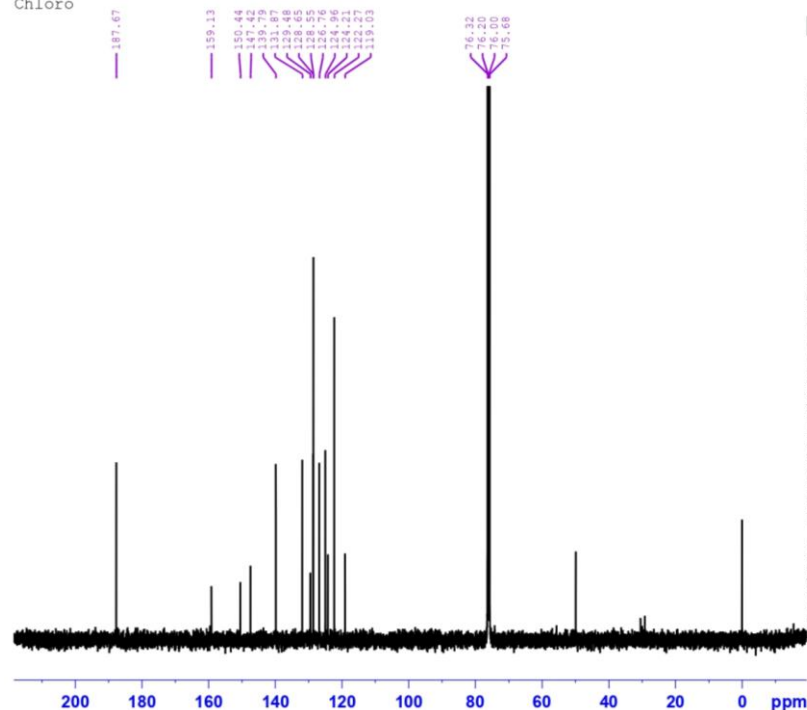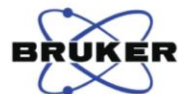

Current Data Parameters  
NAME PCL C13  
EXPNO 17  
PROCNO 1

F2 - Acquisition Parameters  
Date\_ 20221222  
Time\_ 19.08 h  
INSTRUM spect  
PROBHD z108618\_0505 (zpgp30)  
PULPROG zgpg30  
TD 65536  
SOLVENT CDCl3  
NS 512  
DS 4  
SWH 24038.461 Hz  
FIDRES 0.733596 Hz  
AQ 1.3631488 sec  
RG 199.6  
DW 20.800 usec  
DE 6.50 usec  
TE 305.4 K  
D1 2.00000000 sec  
D11 0.03000000 sec  
TDO 1  
SFO1 100.6550186 MHz  
NUC1 13C  
P1 10.00 usec  
PLW1 58.22499847 W  
SFO2 400.2596010 MHz  
NUC2 1H  
CPDPRG2 waltz16  
PCPD2 90.00 usec  
PLW2 14.95499992 W  
PLW12 0.41542000 W  
PLW13 0.20895000 W

F2 - Processing parameters  
SI 32768  
SF 100.6450571 MHz  
WDW EM  
SSB 0  
LB 1.00 Hz  
GB 0  
PC 1.40

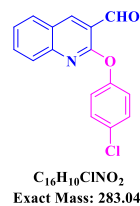

Figure S11.  $^{13}C$  NMR spectrum of 2-(4-chlorophenoxy)quinoline-3-carbaldehyde (**3.3**)



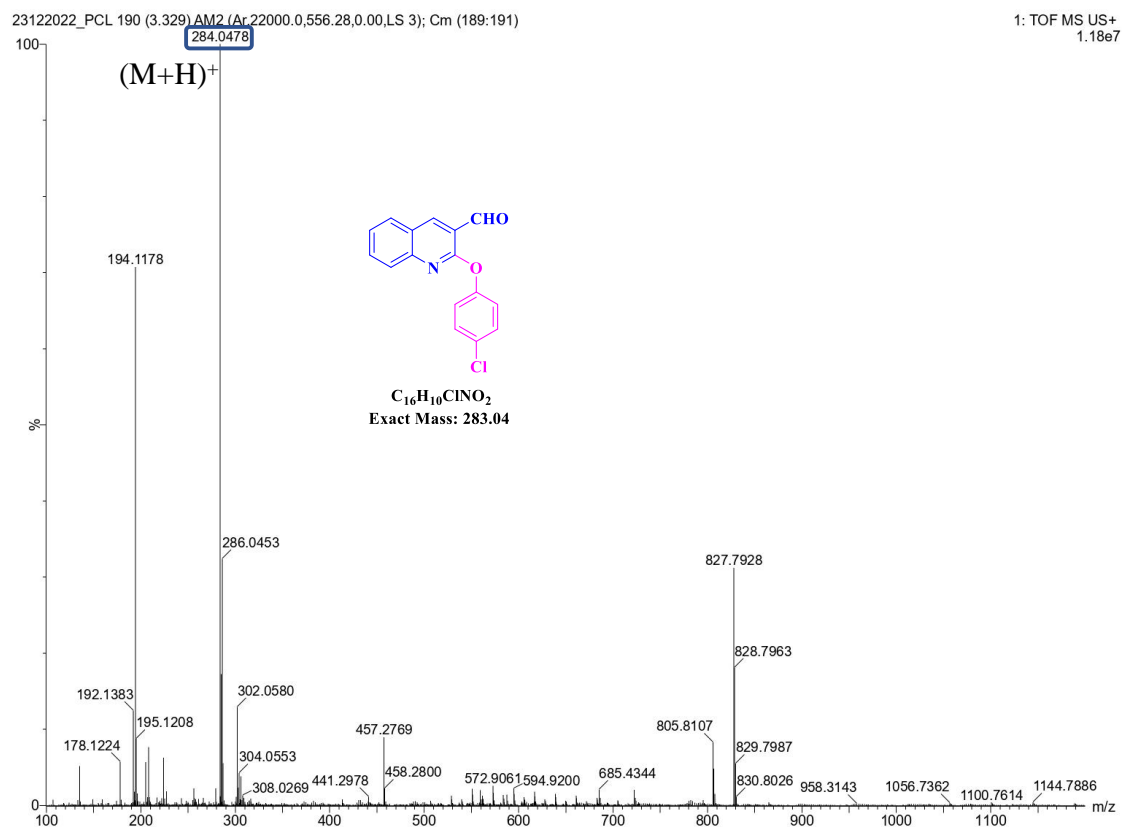

**Figure S12.** HRMS spectrum of 2-(4-chlorophenoxy)quinoline-3-carbaldehyde (**3.3**)

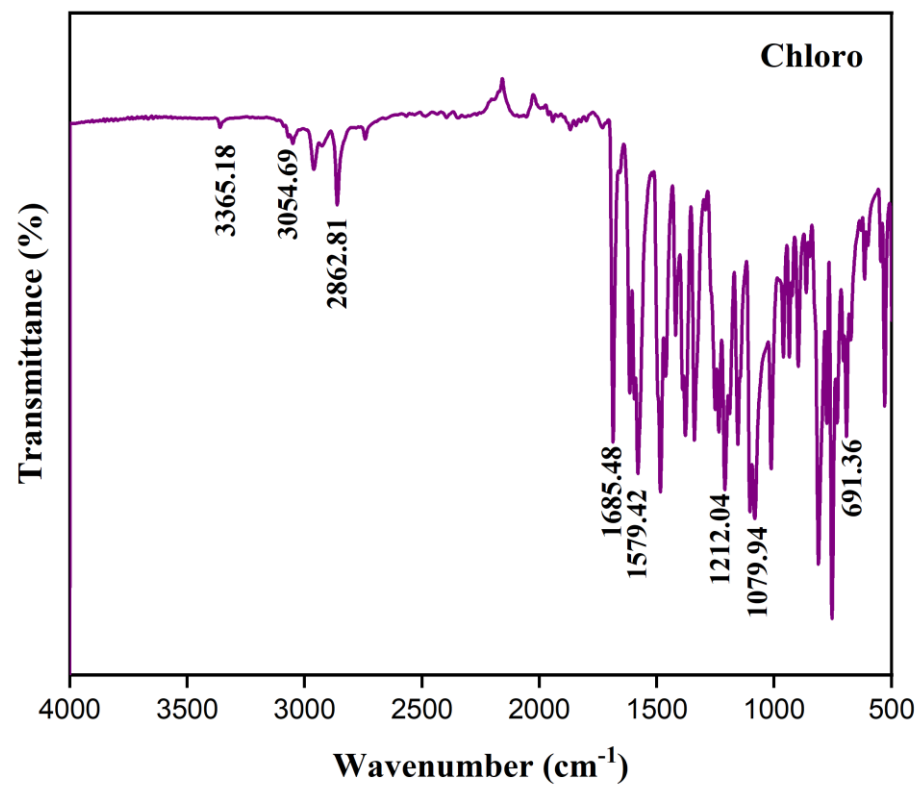

**Figure S13.** FTIR spectrum of 2-(4-chlorophenoxy)quinoline-3-carbaldehyde (**3.3**)

Signature SIF VIT VELLORE  
Nitro

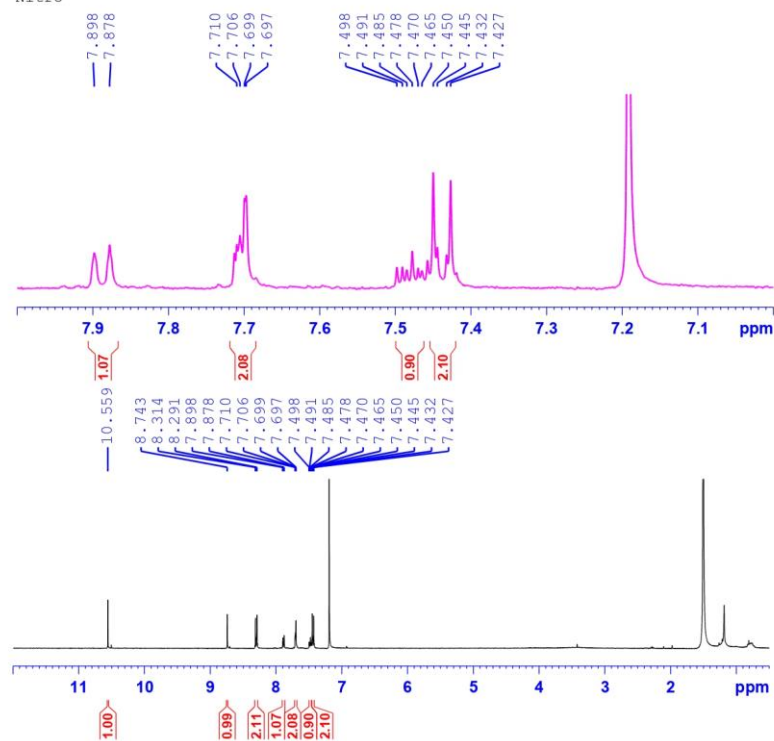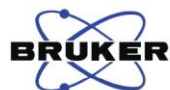

Current Data Parameters  
NAME Dr.M00121222  
EXPNO 18  
PROCNO 1

F2 - Acquisition Parameters  
Date\_ 20221212  
Time 11.51 h  
INSTRUM spect  
PROBHD z108618\_0505 (   
PULPROG zg30  
TD 65536  
SOLVENT CDC13  
NS 32  
DS 2  
SWH 8012.820 Hz  
FIDRES 0.244532 Hz  
AQ 4.0894465 sec  
RG 199.6  
DW 62.400 usec  
DE 6.50 usec  
TE 304.3 K  
DL 1.00000000 sec  
TDO 1  
SFO1 400.2604716 MHz  
NUC1 1H  
P1 15.00 usec  
PLW1 14.95499992 W

F2 - Processing parameters  
SI 65536  
SF 400.2580369 MHz  
WDW EM  
SSB 0  
LB 0.30 Hz  
GB 0  
PC 1.00

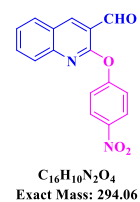

Figure S14.  $^1H$  NMR spectrum of 2-(4-nitrophenoxy)quinoline-3-carbaldehyde (3.4)

Signature SIF VIT VELLORE  
Nitro

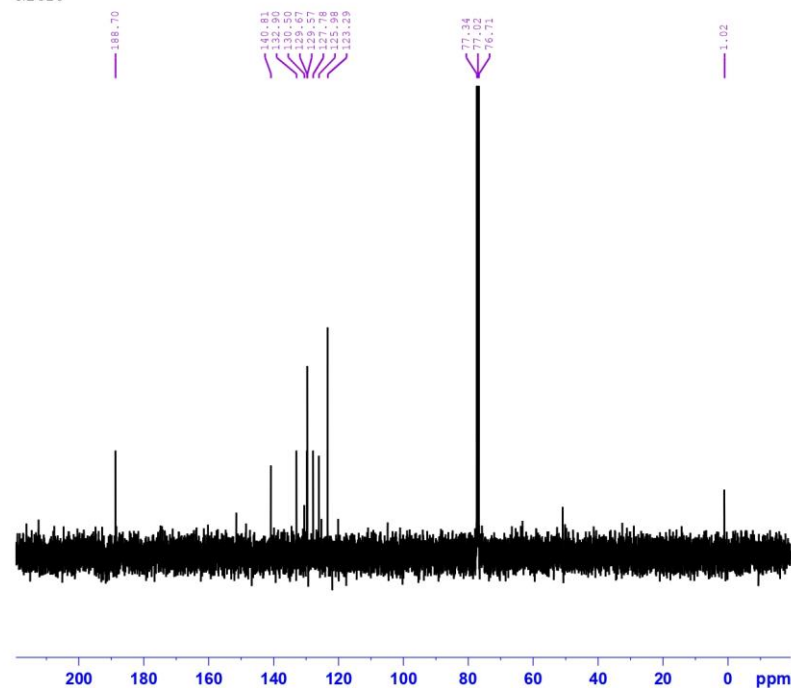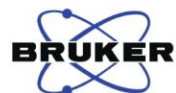

Current Data Parameters  
NAME Dr.MOO22122  
EXPNO 29  
PROCNO 1

F2 - Acquisition Parameters  
Date\_ 20221222  
Time\_ 11.35 h  
INSTRUM spect  
PROBHD z108618\_0505 (4  
PULPROG zgpg30  
TD 65536  
SOLVENT cdcl3  
NS 35  
DS 4  
SWH 24038.461 Hz  
FIDRES 0.733596 Hz  
AQ 1.3631488 sec  
RG 112.69  
DM 20.800 usec  
DE 6.50 usec  
TE 305.1 K  
D1 2.00000000 sec  
D11 0.03000000 sec  
TD0 1  
SFO1 100.6550186 MHz  
NUC1 13C  
P1 10.00 usec  
PLW1 58.22499847 W  
SFO2 400.2596010 MHz  
NUC2 1H  
CPDPRG2 waltz16  
PCPD2 90.00 usec  
PLW2 14.95499992 W  
PLW12 0.41542000 W  
PLW13 0.20895000 W

F2 - Processing parameters  
SI 32768  
SF 100.6449542 MHz  
WDW EM  
SSB 0  
LB 1.00 Hz  
GB 0  
PC 1.40

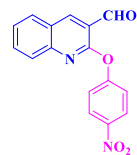

$C_{16}H_{10}N_2O_4$   
Exact Mass: 294.06

Figure S15.  $^{13}C$  NMR spectrum of 2-(4-nitrophenoxy)quinoline-3-carbaldehyde (3.4)

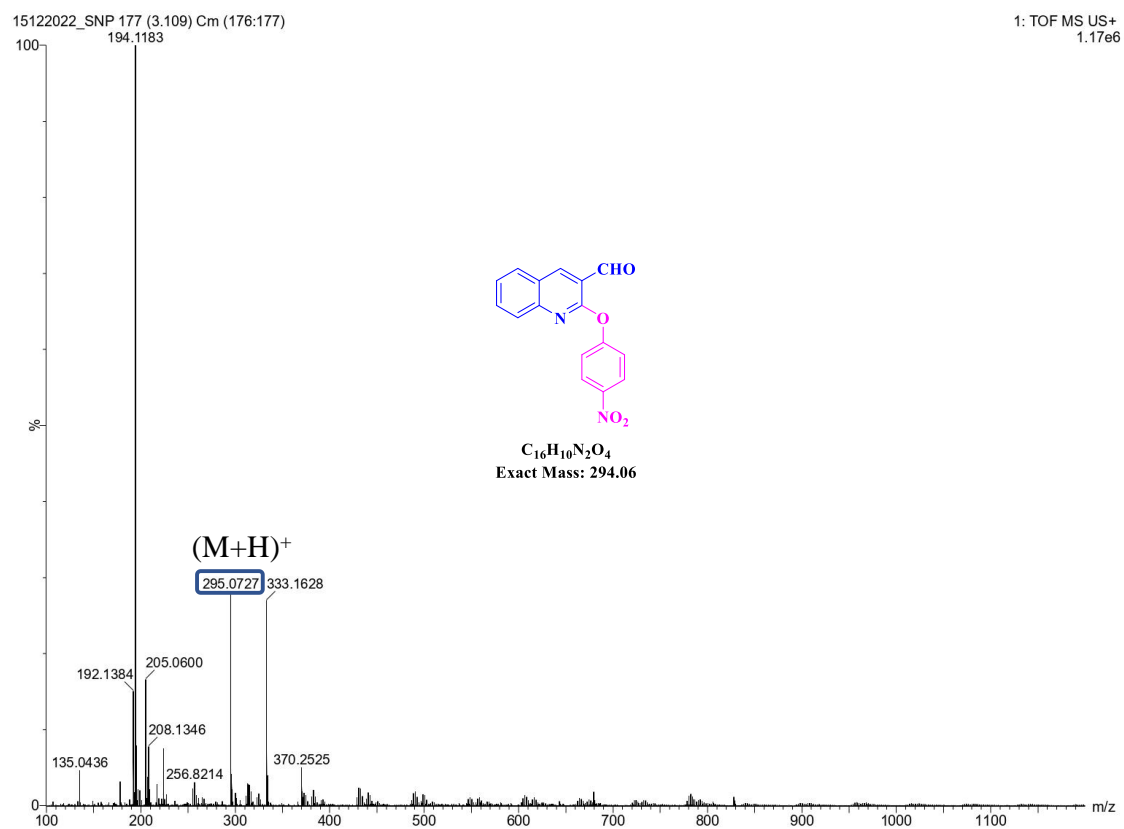

**Figure S16.** HRMS spectrum of 2-(4-nitrophenoxy)quinoline-3-carbaldehyde (**3.4**)

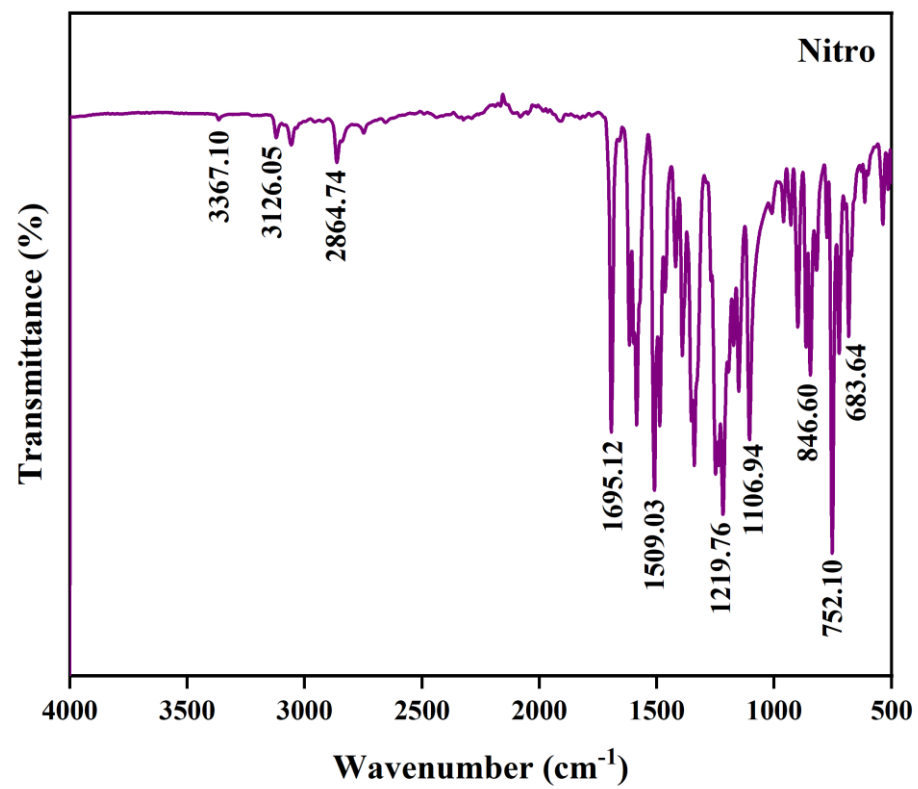

Figure S17. FTIR spectrum of 2-(4-nitrophenoxy)quinoline-3-carbaldehyde (3.4)

Signature SIF VIT VELLORE  
OMe

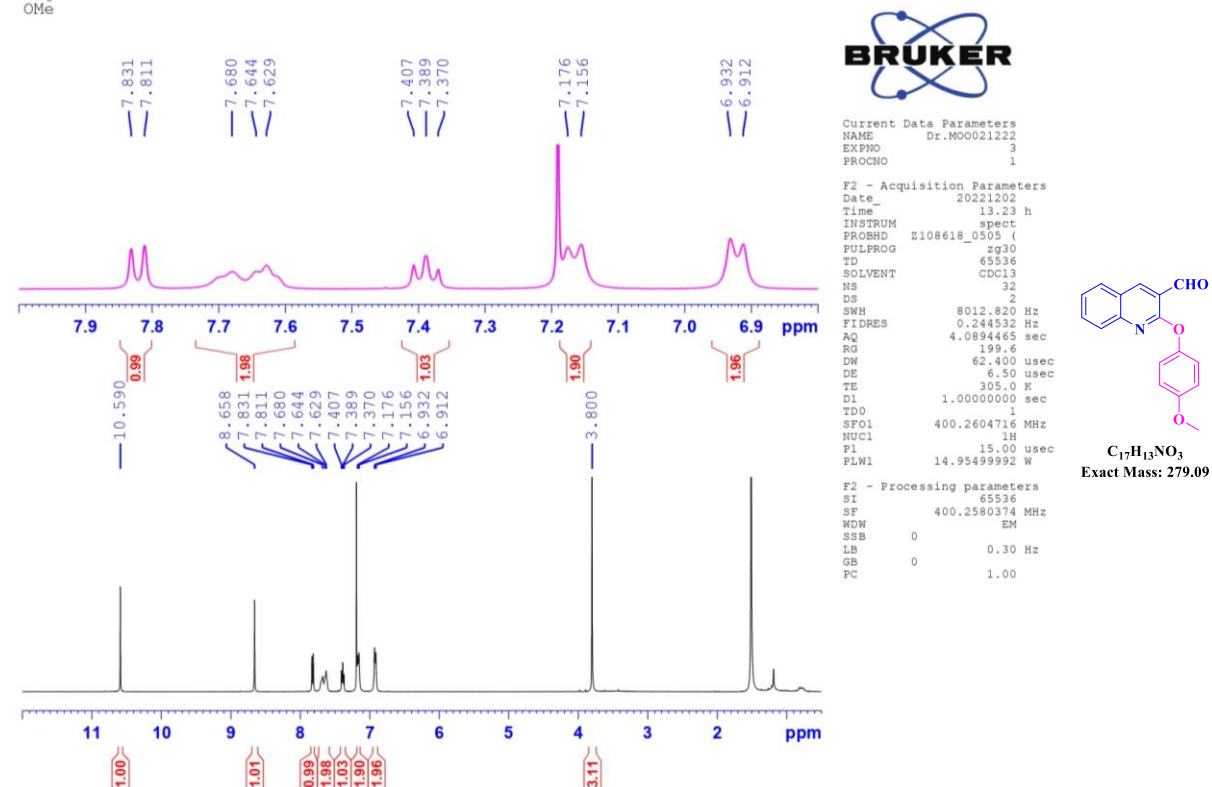

**Figure S18.** <sup>1</sup>H NMR spectrum of 2-(4-methoxyphenoxy)quinoline-3-carbaldehyde (**3.5**)

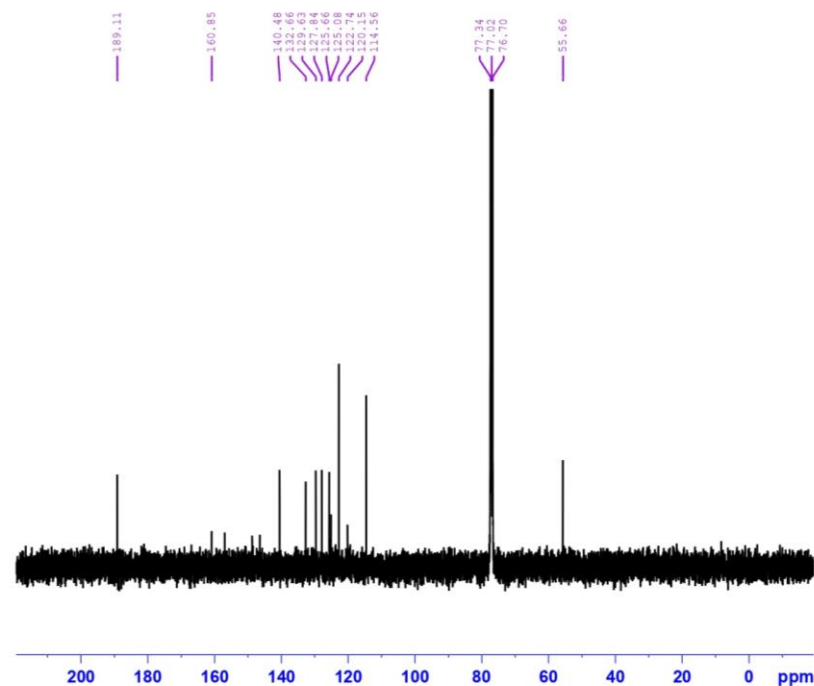

```

Current Data Parameters
NAME          Dr.MMG051222
EXPNO        2
PROCNO       1

F2 - Acquisition Parameters
Date_         20221205
Time          21.11 h
INSTRUM       spect
PROBHD        Z108618
PULPROG       zgpg30
TD            65536
SOLVENT       CDCl3
NS            512
DS            4
SWH           24038.461 Hz
FIDRES        0.733596 Hz
AQ            1.3631488 sec
RG            143.73 Hz
SW            20.800 usec
DE            6.50 usec
TE            305.9 K
D1            2.00000000 sec
d11           0.03000000 sec
TD0           1
SF01          100.6550186 MHz
NUC1          13C
P1            10.00 usec
PL1           58.22499847 W
SF02          400.2596010 MHz
NUC2          1H
CPDPRG2       waltz12
PCPD2         90.00 usec
PL2           14.95499992 W
PLM12         0.41542000 W
PLM13         0.20895000 W

F2 - Processing parameters
SI            32768
SF            100.64499542 MHz
WDW           EM
SSB           0
GB            0
PC            1.40

```

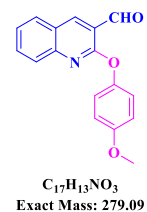

**Figure S19.** <sup>13</sup>C NMR spectrum of 2-(4-methoxyphenoxy)quinoline-3-carbaldehyde (**3.5**)



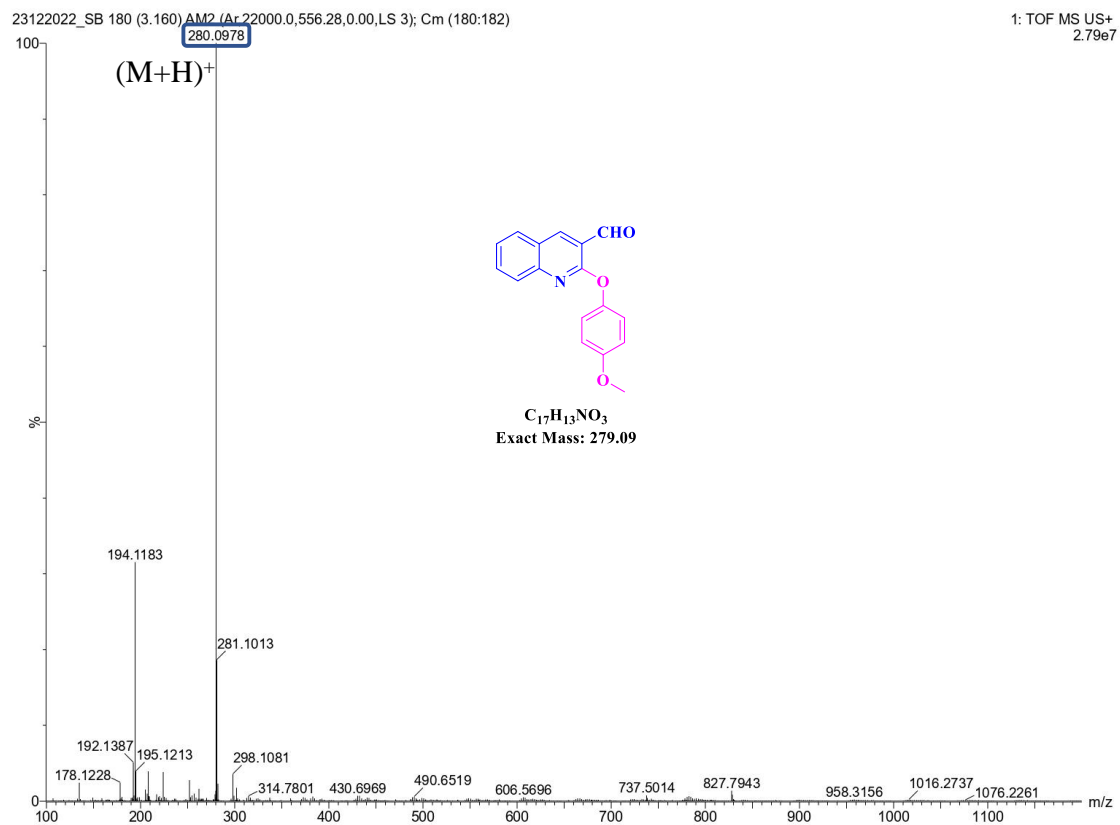

**Figure S20.** HRMS spectrum of 2-(4-methoxyphenoxy)quinoline-3-carbaldehyde (**3.5**)

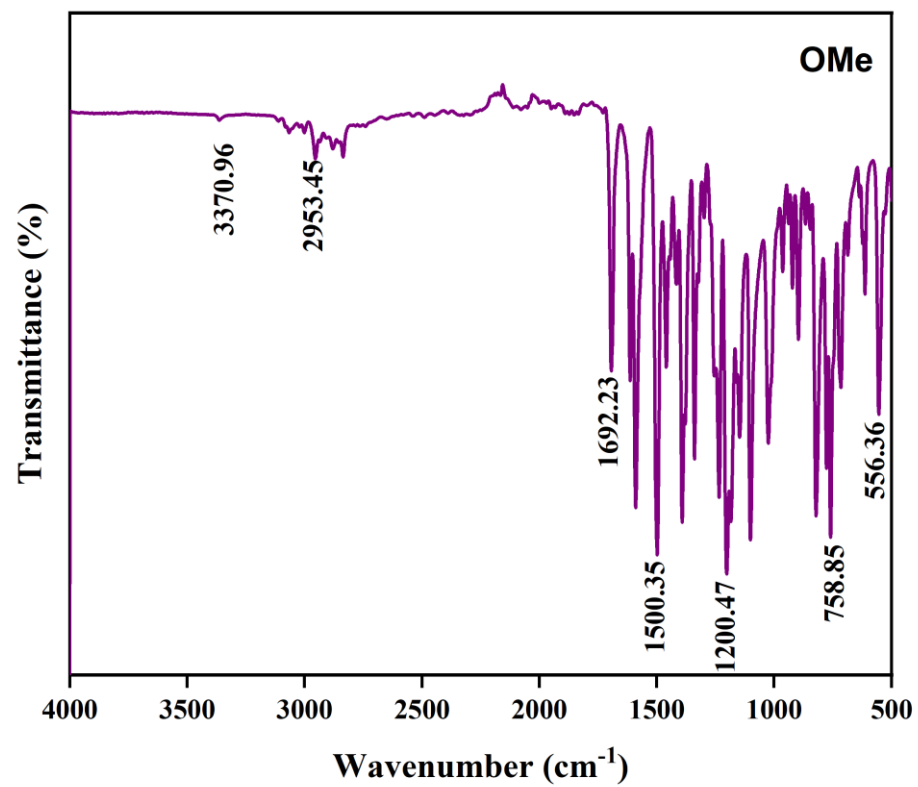

Figure S21. FTIR spectrum of 2-(4-methoxyphenoxy)quinoline-3-carbaldehyde (3.5)

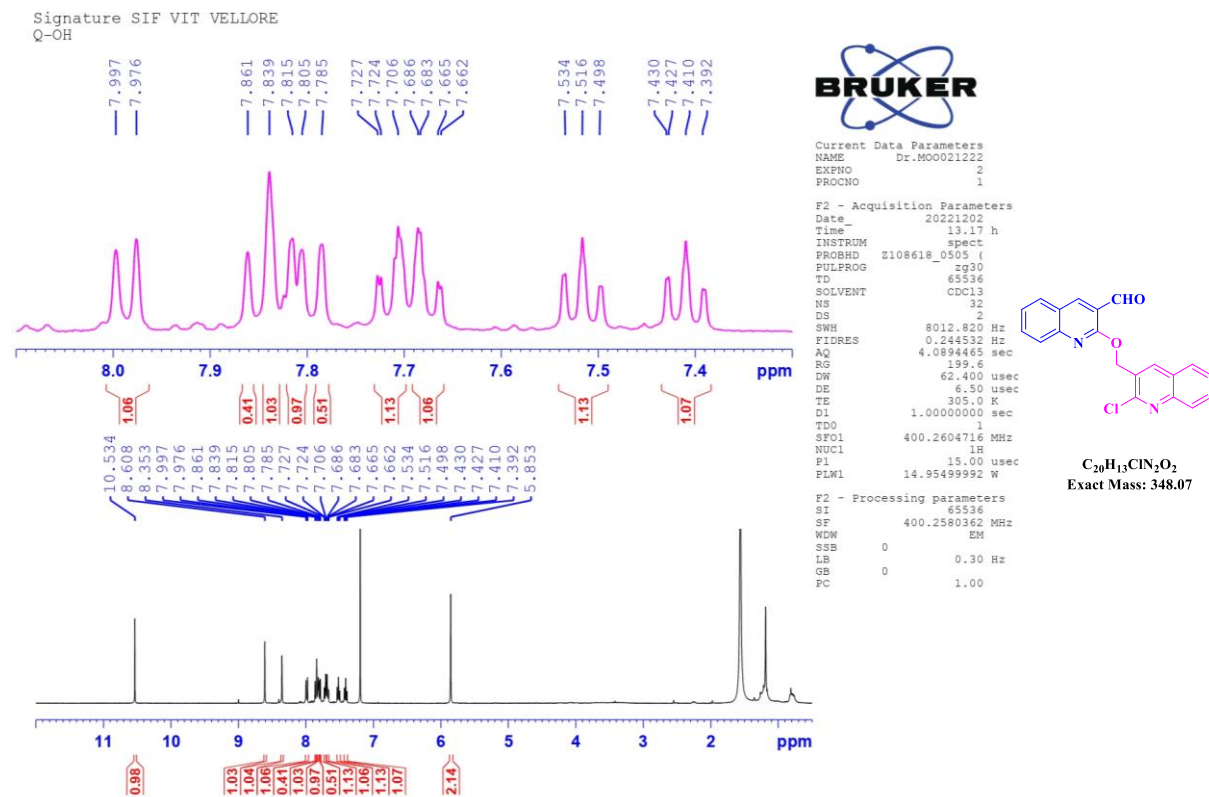

Figure S22. <sup>1</sup>H NMR spectrum of 2-((2-chloroquinolin-3-yl)methoxy)quinoline-3-carbaldehyde (3.6)

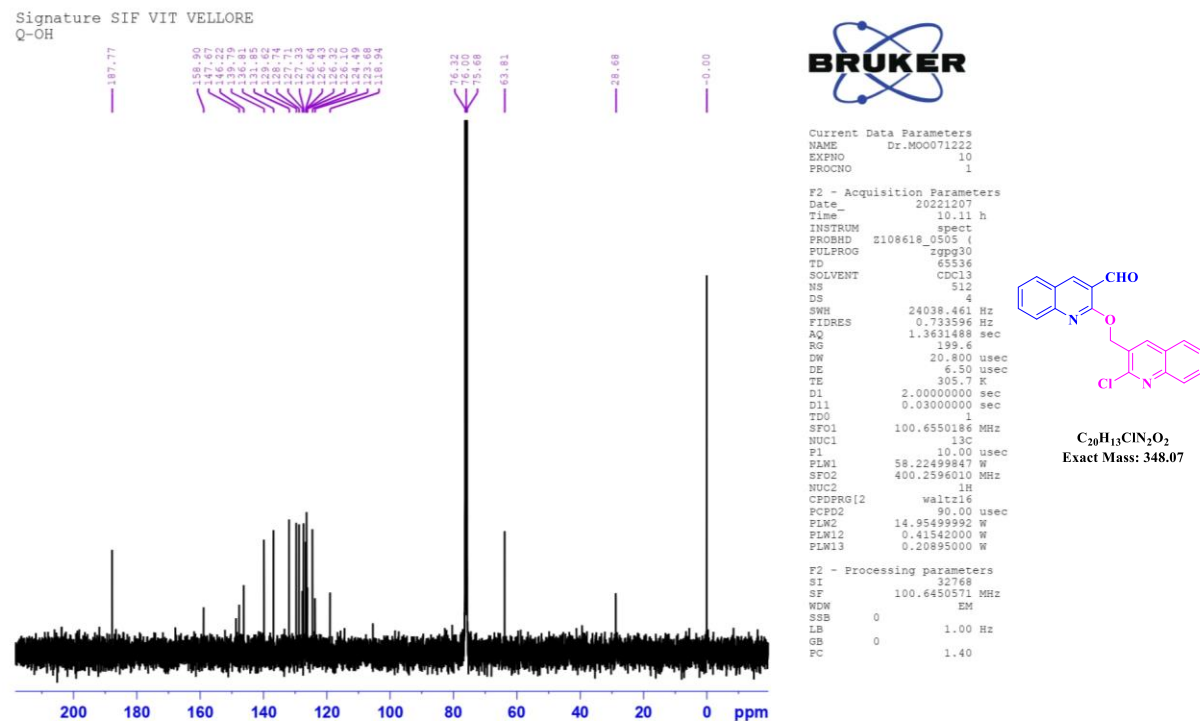

**Figure S23.** NMR spectrum of 2-((2-chloroquinolin-3-yl)methoxy)quinoline-3-carbaldehyde (**3.6**)

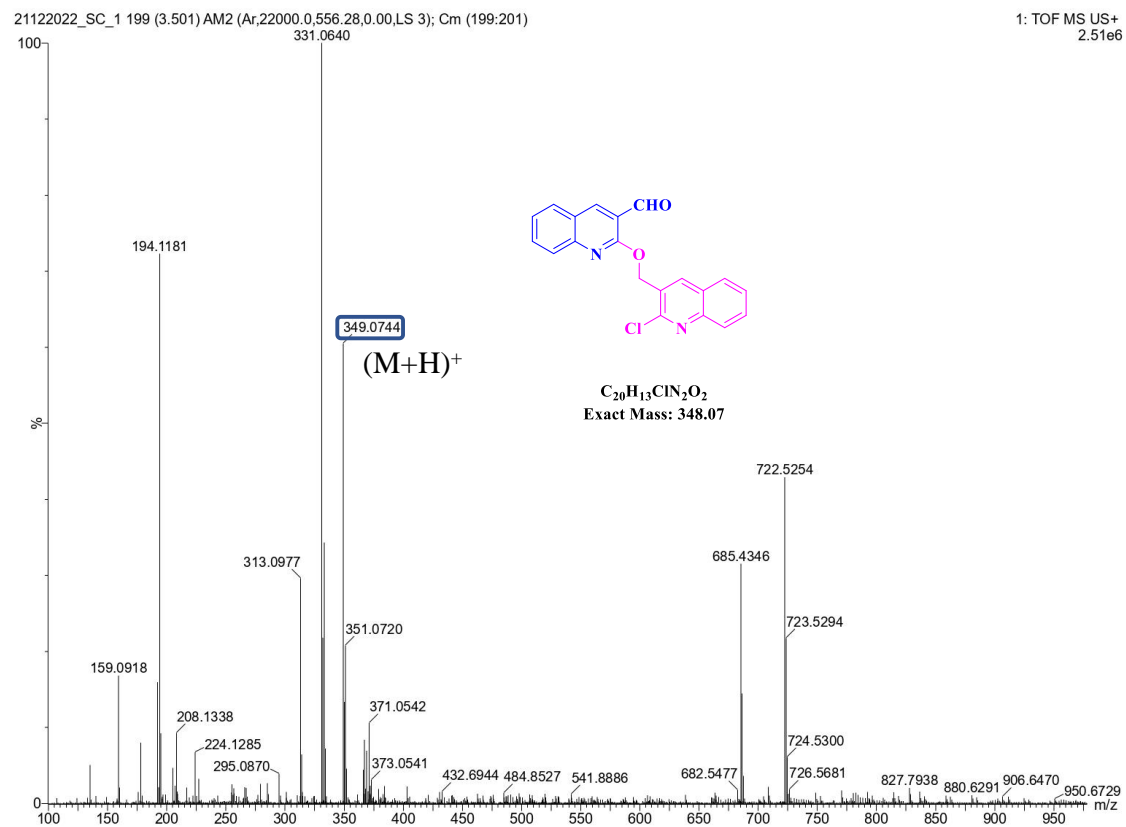

**Figure S24.** HRMS spectrum of 2-((2-chloroquinolin-3-yl)methoxy)quinoline-3-carbaldehyde (**3.6**)

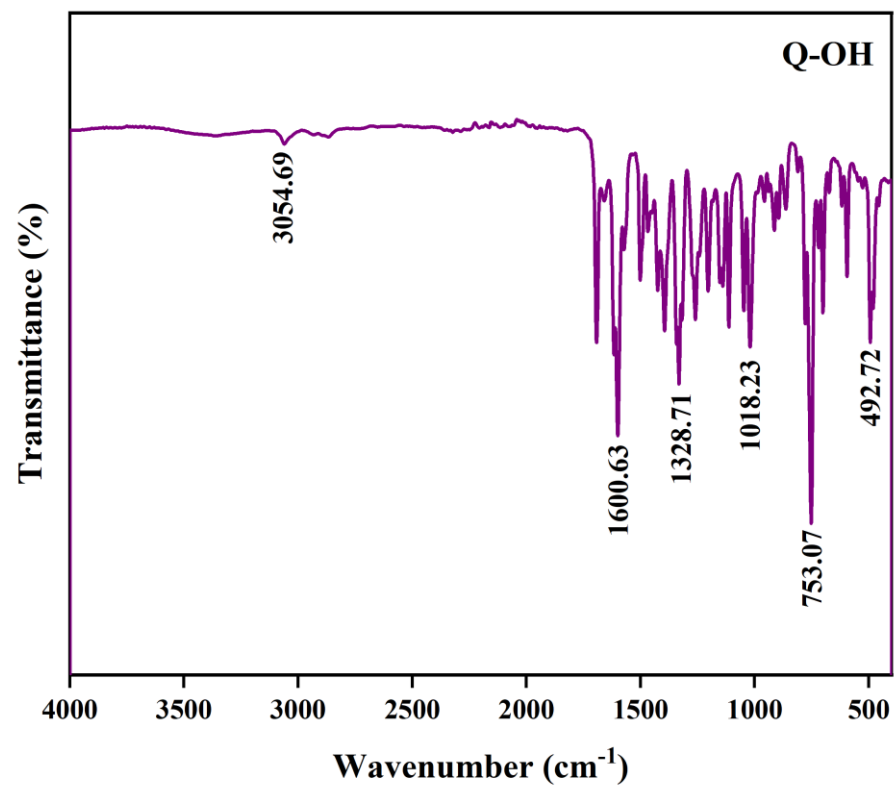

**Figure S25.** FTIR spectrum of 2-((2-chloroquinolin-3-yl)methoxy)quinoline-3-carbaldehyde (**3.6**)

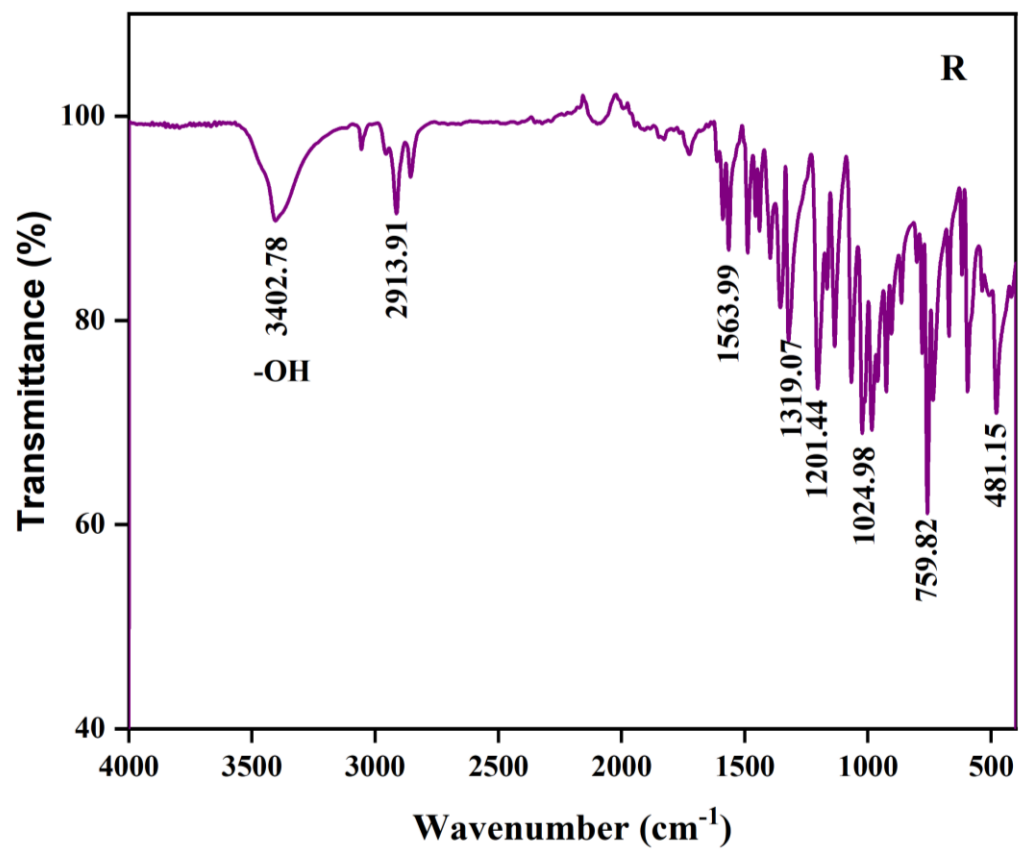

Figure S26. FTIR spectrum of (2-chloroquinolin-3-yl)methanol

Signature SIF VIT VELLORE  
MeOH

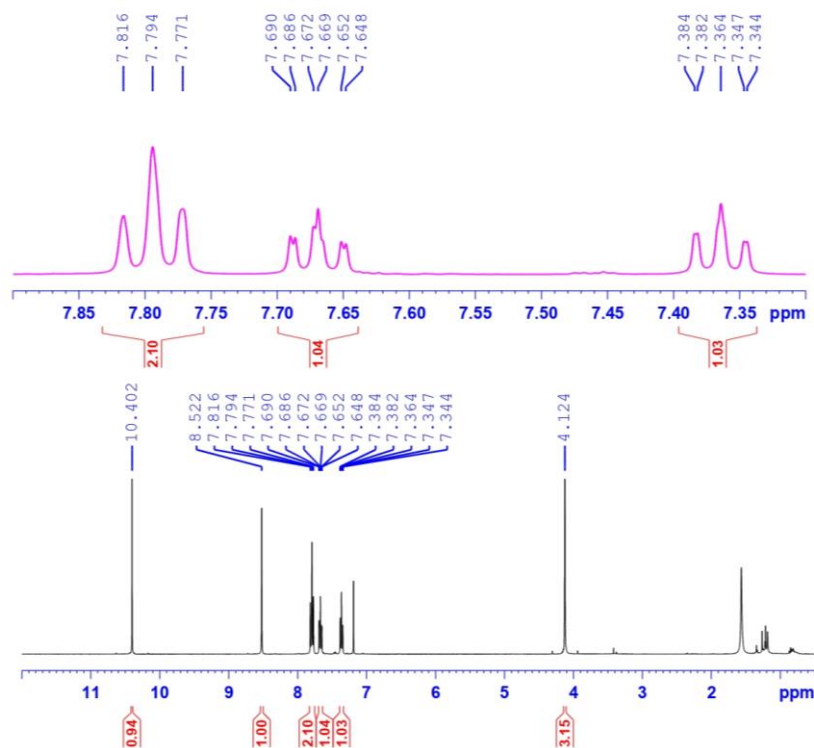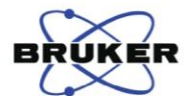

Current Data Parameters  
NAME MEOH H1 NMR  
EXPNO 30  
PROCNO 1

F2 - Acquisition Parameters  
Date\_ 20221222  
Time 13.46 h  
INSTRUM spect  
PROBHD Z108618\_0505 (zg30)  
TD 65536  
SOLVENT CDCl3  
NS 32  
DS 2  
SWH 8012.820 Hz  
FIDRES 0.244532 Hz  
AQ 4.0894465 sec  
RG 175.97  
DW 62.400 usec  
DE 6.50 usec  
TE 304.7 K  
D1 1.00000000 sec  
TD0 1  
SFO1 400.2604716 MHz  
NUC1 1H  
P1 15.00 usec  
PLW1 14.95499992 W

F2 - Processing parameters  
SI 65536  
SF 400.2580376 MHz  
WDW EM  
SSB 0  
LB 0.30 Hz  
GB 0  
PC 1.00

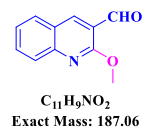

Figure S27.  $^1H$  NMR spectrum of 2-methoxyquinoline-3-carbaldehyde (3.7)



Signature SIF VIT VELLORE  
MeOH

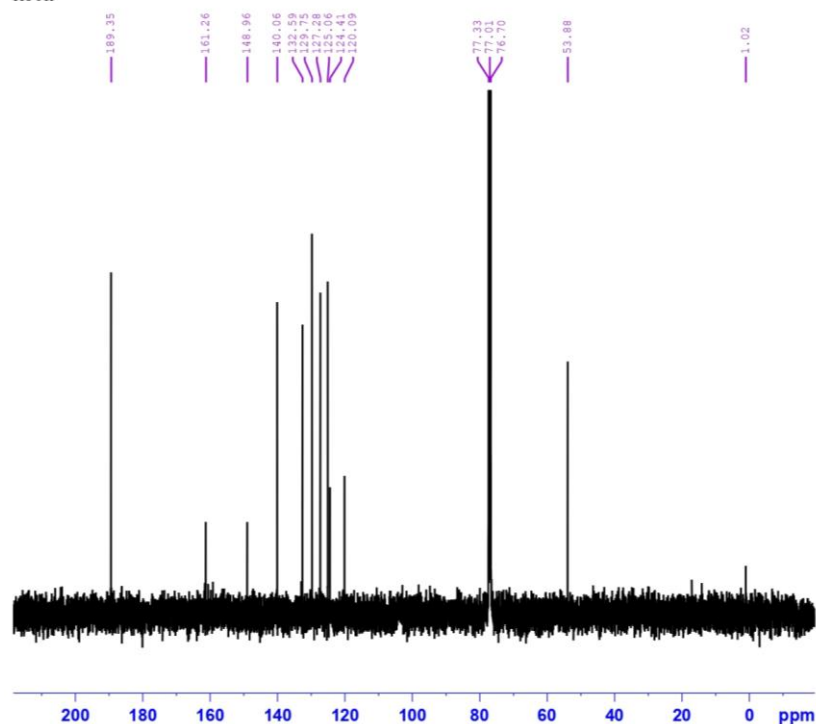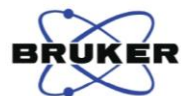

Current Data Parameters  
NAME MeOH C13  
EXPNO 31  
PROCNO 1

F2 - Acquisition Parameters  
Date\_ 20221223  
Time 4.45 h  
INSTRUM spect  
PROBHD 2108618\_0505 (zpgp30)  
FULPROG 65536  
TD 512  
SOLVENT CDC13  
DS 4  
SWH 24038.461 Hz  
FIDRES 0.733596 Hz  
AQ 1.3631488 sec  
RG 199.6  
DM 20.800 usec  
DE 6.50 usec  
TE 305.3 K  
D1 2.00000000 sec  
D11 0.03000000 sec  
TD0 1  
SFO1 100.6550186 MHz  
NUC1 13C  
P1 10.00 usec  
PLN1 58.22499847 W  
SFO2 400.2596010 MHz  
NUC2 1H  
CPDPRG2 waltz16  
PCPD2 90.00 usec  
PLN2 14.95499992 W  
PLW12 0.41542000 W  
PLW13 0.20895000 W

F2 - Processing parameters  
SI 32768  
SF 100.6449542 MHz  
WDW EM  
SSB 0  
LB 1.00 Hz  
GB 0  
PC 1.40

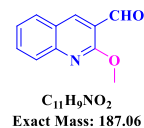

**Figure S28.** <sup>13</sup>C NMR spectrum of 2-methoxyquinoline-3-carbaldehyde (**3.7**)

23122022\_SMH 166 (2,923) AM2 (Ar,22000.0,556.28,0.00,LS 3); Cm (166:169)

1: TOF MS US+  
5.53e7

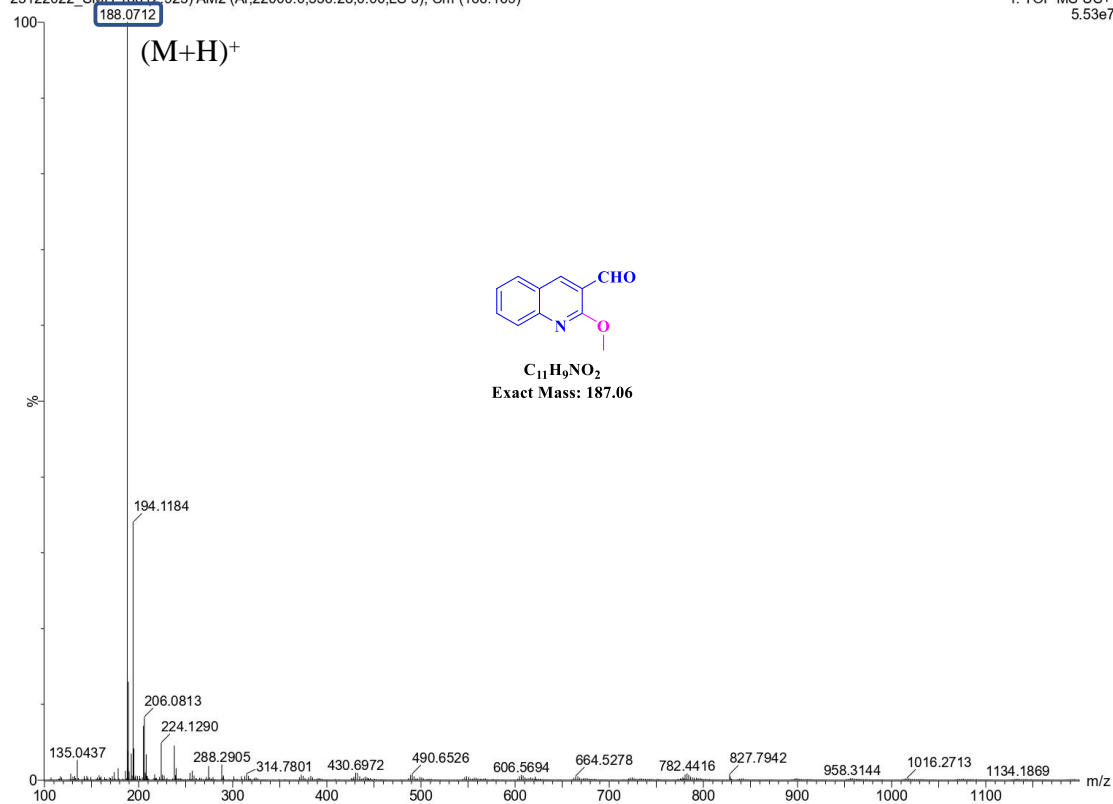

**Figure S29.** HRMS spectrum of 2-methoxyquinoline-3-carbaldehyde (**3.7**)

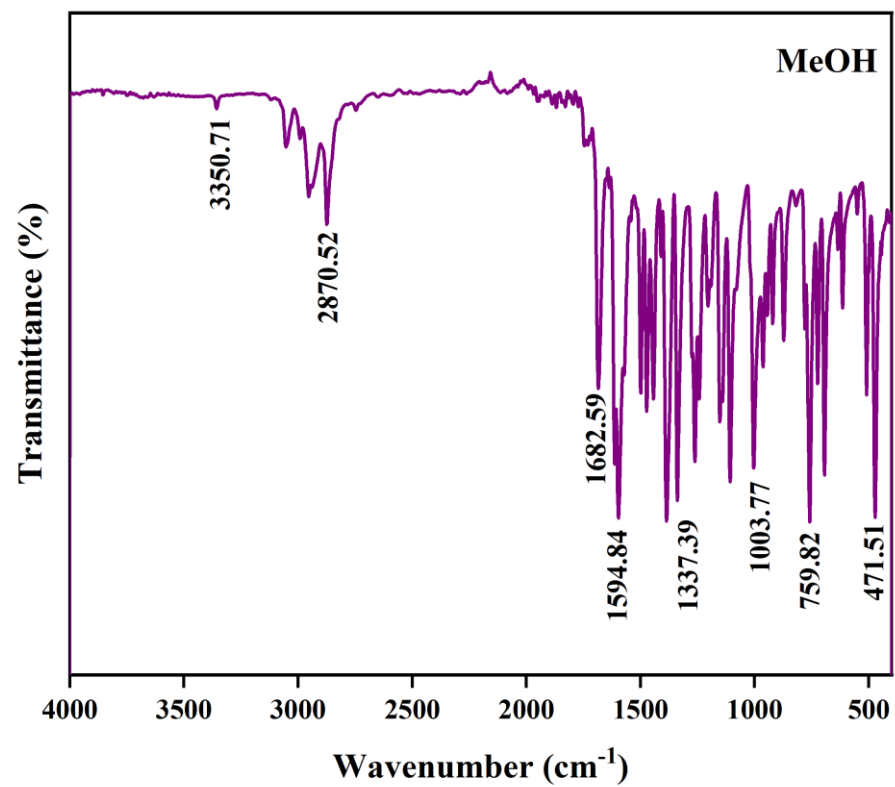

**Figure S30.** FTIR spectrum of 2-methoxyquinoline-3-carbaldehyde (3.7)
